# Supplementary material
Source: PubMed Central journal article supplement (PMC3212624)
Supplement: NIHMS326979-supplement-Supp_Fig_S1-S3___Table_S1.pdf [file NIHMS326979-supplement-Supp_Fig_S1-S3___Table_S1.pdf]

## Supporting Information

### The *N*-acetyl-D-glucosamine repressor NagC of *Vibrio fischeri* facilitates colonization of *Euprymna scolopes*

Tim Miyashiro,<sup>1\*</sup> Will Klein,<sup>1</sup> Dane Oehlert,<sup>1</sup> Xiaodan Cao,<sup>1,2</sup> Julia Schwartzman,<sup>1</sup> and Edward G. Ruby<sup>1</sup>

<sup>1</sup>Department of Medical Microbiology and Immunology  
University of Wisconsin School of Medicine and Public Health  
1550 Linden Drive, Madison, WI 53706-1521, USA

<sup>2</sup>State Key Laboratory of Bioreactor Engineering  
East China University of Science and Technology  
Shanghai 200237, China

\*Corresponding author  
Email: miyashiro@wisc.edu  
Phone: (608) 262-5550  
Fax: (608) 262-8418

#### This supplement contains:

Strain Construction  
Table S1  
Figure S1  
Figure S2  
Figure S3

## Strain Construction

Allelic exchange vectors. To construct the plasmid pTM322, which contains the  $\Delta nagC$  allele that is an in-frame mutation lacking the sequence encoding amino acids 30-394, the regions surrounding *nagC* were amplified from ES114 (Ruby *et al.*, 2005) genomic DNA by PCR using primers P01/P02 and P03/P04 (Table S1), digested by XhoI/XmaI and XmaI/XbaI, and cloned into the vector fragment of pEVS79 that had been digested with XhoI/XbaI. The strain WPK100 was isolated by conjugating pTM322 into ES114 via pEVS104 (Stabb *et al.*, 2002), and allowing for a double-crossover event as described elsewhere (Miyashiro *et al.*, 2010).

To construct the plasmid pTM346 and pTM350, which contain the *nagC-myc-6xHis* and *nagC(E241A)-myc-6xHis* alleles, '*nagC-myc-6xHis*' and '*nagC(E241A)-myc-6xHis*' were amplified from pTM331 and pTM345 by PCR using primers P05/P06, and cloned into the vector fragment of pTM322 that had been digested with SmaI/PmlI. The strains TIM377 and TIM381 were isolated by conjugating pTM346 and pTM350 into WPK100 via pEVS104, and allowing for double-crossover events as described elsewhere (Miyashiro *et al.*, 2010).

To construct the plasmid pXDC34, which contains the  $\Delta nagB$  allele that is an in-frame mutation lacking the sequence encoding amino acids 6-264, the regions surrounding *nagB* were amplified from ES114 genomic DNA by PCR using primers P17/P18 and P19/P20, digested by XhoI/XmaI and XmaI/XbaI, and cloned into the vector fragment of pEVS79 that had been digested with XhoI/XbaI. The strain CA42 was isolated by conjugating pXDC34 into ES114 via pEVS104, and allowing for a double-crossover event. To construct the erm-resistant strain JAS101, the erm cassette of vector pEVS107 was integrated into the Tn7 site of CA42.

Protein expression vectors. To construct the plasmid pTM331, which contains *nagC-myc-6xHis* under arabinose-inducible control, *nagC* was amplified from ES114 genomic DNA by PCR using primers P07/P08, digested with BspHI/XbaI, and cloned into the vector fragment of pBAD-myc-

his (Invitrogen Corporation, Carlsbad, CA, USA) that had been digested with NcoI/XbaI. To construct the plasmid pTM345, which contains *nagC(E241A)-myc-6xHis* under arabinose-inducible control, the QuikChange II XL Site-Directed Mutagenesis Kit (Agilent Technologies, Inc., Santa Clara, CA, USA) was used according to the manufacturer's instructions. Plasmid pTM331 served as a template to mutate the glutamine GAA codon in position 241 of the NagC protein to the alanine codon GCA by introducing an A→C point mutation with primers P09/P10.

Two-color fluorescent-reporter plasmids. To construct pTM314, the *VF\_1598* promoter region was amplified from ES114 genomic DNA by PCR using primers P11/P12, and the product was digested by XmaI/XbaI, and ligated to the vector fragment of pTM267 (Miyashiro *et al.*, 2010) that was digested with XmaI/XbaI. In pTM267, the *mCherry* gene is upstream of the *rrnB t1* terminator and *gfp*. The plasmid pTM355 was constructed in the same manner by cloning the *nagA* promoter that was amplified from ES114 genomic DNA by PCR using primers P13/P14 into pTM267.

To construct pTM361, which contains the *nagA* promoter with a mutated NagC operator site, the *nagA* promoter was amplified from ES114 genomic DNA by PCR using primers P13/P14 and the resulting product was cloned into pCR-Blunt II-TOPO using the Zero Blunt TOPO PCR Cloning Kit (Invitrogen Corporation). The resulting vector served as template to mutate the two thymidines conserved in the NagC operator site to two guanines using primers P15/P16 and the QuikChange II XL Site-Directed Mutagenesis Kit. The mutated *nagA* promoter was excised using XmaI/XbaI and cloned into the vector fragment of pTM267 that was digested with XmaI/XbaI.

IPTG-inducible plasmids. Plasmid pTM214, which contains *mCherry* downstream of the IPTG-inducible *P<sub>trc</sub>* promoter was constructed through several cloning steps. The start codon was removed from pTrc99A (Amann *et al.*, 1988) by digesting the vector with NcoI and making the

ends blunt with Mung Bean Nuclease. The resulting vector was self-ligated using T4 DNA ligase. The *mCherry* gene was amplified by PCR from pRSETB-*mCherry* (Shaner *et al.*, 2004) using primers P21 and P22, digested with BglII/Sall, and cloned into the BamHI/Sall sites within the mutated pTrc99A vector described above. From the resulting plasmid, the cassette containing *lacI<sup>q</sup> P<sub>trc</sub>-mCherry T1 T2* was amplified by PCR using primers P23 and P24, digested with NotI/Spel, and cloned into the NotI/Spel sites of the *V. fischeri*-specific plasmid pVSV105 (Dunn *et al.*, 2006).

To construct pTM360, which contains *nagC* downstream of the IPTG-inducible *P<sub>trc</sub>* promoter, the *nagC* gene was amplified by PCR from ES114 genomic DNA by PCR using primers P25 and P26, digested with SacI/Sall, and cloned into the SacI/Sall sites within pTM214. This cloning procedure replaces *mCherry* in pTM214 with *nagC*.

**Table S1. Primers used in this study.**

| <b>Primer name</b>                                           | <b>Primer DNA Sequence</b>                       |
|--------------------------------------------------------------|--------------------------------------------------|
| <b>Primers used for construction of strains and plasmids</b> |                                                  |
| P01                                                          | GCCTCGAGCTTAACCTGTTCTTCACAAAACCTT                |
| P02                                                          | GGCCCGGGACCTTTTTGGTCGATTAAACGATA                 |
| P03                                                          | GGCCCGGGGTCTTGTTACAAAATTACTC                     |
| P04                                                          | GGTCTAGAGGTGATTTGGCATTGCTAATAAAA                 |
| P05                                                          | ATTTCTCGAATTCAAATTGCAGAT                         |
| P06                                                          | GTGAATAGAGACTCGTGATTAATGATGATGATGATGGTTCGAC      |
| P07                                                          | TCTCATGACTGGCGGACAAATTGGTAA                      |
| P08                                                          | CCTCTAGAAATTCATCGAGTAATTTTTGTAACAA               |
| P09                                                          | GGTCATAACCGCAATGTAGGTGCAATTGGTCATATCCAAATTGAC    |
| P10                                                          | GTCAATTTGGATATGACCAATTGCACCTACATTGCGGTTATGACC    |
| P11                                                          | CCCCCGGGCCAATCATTTAAATCTAAAAACGT                 |
| P12                                                          | GCTCTAGATCTTTTTAAACATAAATAACATCCT                |
| P13                                                          | GCCCGGGCTTTAGATTCCCCCTATAAGGATT                  |
| P14                                                          | GCTCTAGAATAAACTTTACAGTTAGTTAGCGC                 |
| P15                                                          | TAGCGAGATCATAAACTTATGGTATCATTGAAAGAATAAAAAC      |
| P16                                                          | GTTTTATTCTTTTGAATGATACCATAAGTTTTATGATCTCGCTA     |
| P17                                                          | GCCTCGAGCGTGGTTGCCAAAAGTGAAAATGC                 |
| P18                                                          | GGCCCGGGGATTAATCTCATTGTGTATACCTCA                |
| P19                                                          | GGCCCGGGTTTTAATTTATTGCATTAATTTTCG                |
| P20                                                          | GGTCTAGAAGTAATGTGTTTTAGATAAGGTC                  |
| P21                                                          | CCAGATCTAATTAAGAGGAGAAATTAAGCATGGTGAGCAAGGGC     |
| P22                                                          | CCGTCGACTTACTTGTACAGCTCGTCCA                     |
| P23                                                          | CGACTAGTGCAGCAGATCAATTC                          |
| P24                                                          | GTGCGGCCGCTGTAGAAACGCAAAA                        |
| P25                                                          | TCGAGCTCAGAGGAGAAATTAAGCATGACTGGCGGACAAATTGGTAAT |
| P26                                                          | AGGTCGACTTATTCATCGAGTAATTTTTGTAA                 |
| <b>Primers used for qPCR measurements</b>                    |                                                  |
| VF_1598-U                                                    | ATGCATGGACACAAGTTTCTGGGC                         |
| VF_1598-L                                                    | TACCGGTTCTGTTTCCTTCAACGGT                        |
| nagA-U                                                       | GCGATTCCAACGTGCTCAA                              |
| nagA-L                                                       | TGCAGGTGCTGACATGGAATA                            |
| VF_0655-U                                                    | ATTGCTTACCAAGCCCAATGGTGG                         |
| VF_0655-L                                                    | AGGCTAGCTTCAGGGATTATGGCA                         |
| VF_2139-U                                                    | ACAACTACTTCCACGGTGCCGAT                          |
| VF_2139-L                                                    | GCATTGCGAAACGAGGCATACCAT                         |
| VF_A0013-U                                                   | AGCGTGTGAGGCTGCTTATGATGA                         |
| VF_A0013-L                                                   | TCACCTGCGGAACATAAGTGACCA                         |
| VF_A0143-U                                                   | TCAGGCGTATCGGCACATGGTTAT                         |
| VF_A0143-L                                                   | TTGTGGTTCCCATTGAACAGCACC                         |
| nagB-U                                                       | CAGAAGATCACGAAGCGGAAT                            |

|        |                             |
|--------|-----------------------------|
| nagB-L | TTTTAATACGTGTGCGAGAAGATAGAG |
| nagE-U | CGGTGGCCTAGTACACTTTGG       |
| nagE-L | TCGTTAATACCCGCTACGTCAA      |

**Primers used for fluorescence anisotropy measurements<sup>†</sup>**

|             |                                                |
|-------------|------------------------------------------------|
| nagA-O-U    | /5TexRd-XN/TAAAACTTATTTTTATCATTTCGAAAGAATAAAAC |
| nagA-O-L    | GTTTTATTCTTTTCGAATGATAAAATAAGTTTTA             |
| nagA-O1-U   | /5TexRd-XN/TAAAACTTATGGTATCATTTCGAAAGAATAAAAC  |
| nagA-O1-L   | GTTTTATTCTTTTCGAATGATACCATAAGTTTTA             |
| VF_1598-O-U | /5TexRd-XN/AAAACTAAATTCAAAGCACAAATAAACATCTA    |
| VF_1598-O-L | TAGATGTTTTATTTGTGCTTTGAATTTAGTTTTT             |
| luxI-O-U    | /5TexRd-XN/ACATTGCAGCTGTAGGATGGTACAGGTTTCCGT   |
| luxI-O-L    | ACGGAAACCTGTACCATCCTACAGCTGCAATGT              |

<sup>†</sup> /5TexRd-XN/ indicates 5' Texas Red label

**Primers used for 5' RACE**

|             |                                       |
|-------------|---------------------------------------|
| RNA-linker  | AUAUGCGCGAAUCCUGUAGAACGAACACUAGAAGAAA |
| Adapter     | GCGCGAATTCCTGTAGA                     |
| nagA-nested | GGAGTATCATAAATTGCACCCACA              |

Fig. S1

A.

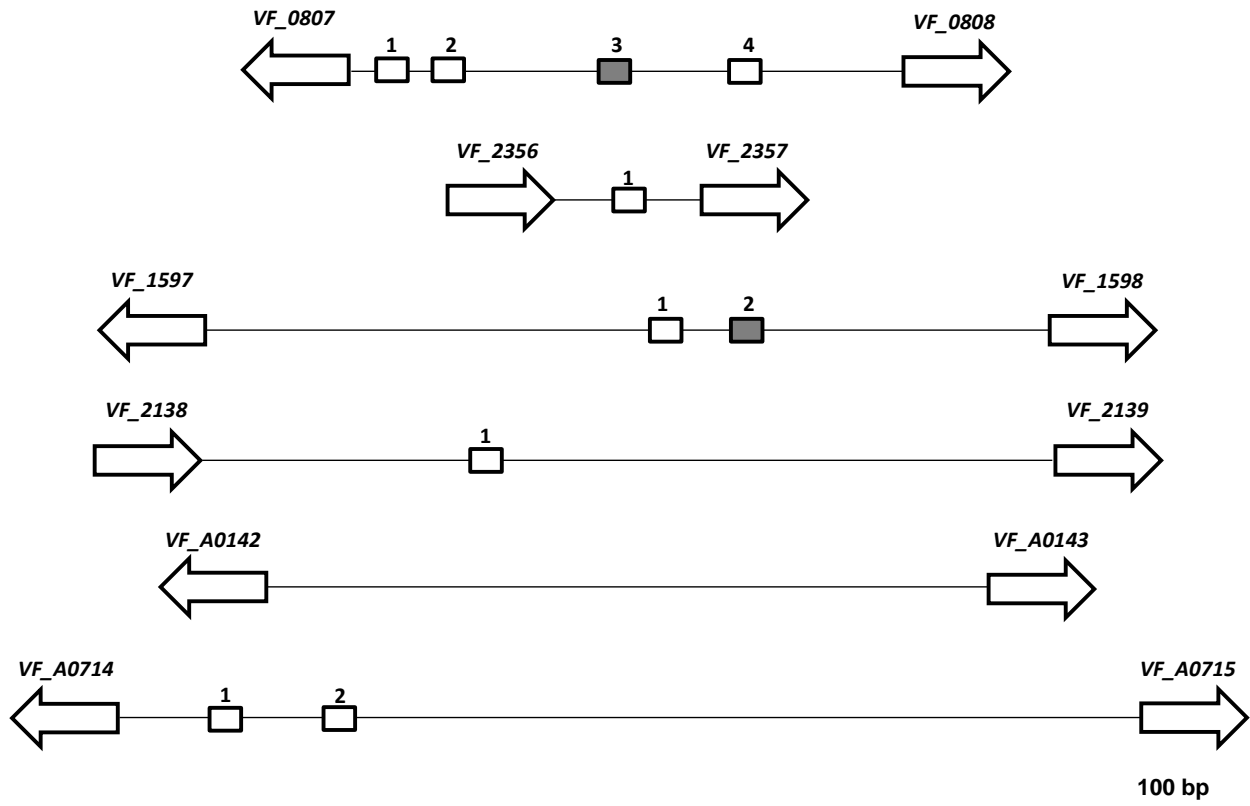

B.

| consensus         | NagC box |                                                                                                                                                                               |
|-------------------|----------|-------------------------------------------------------------------------------------------------------------------------------------------------------------------------------|
|                   |          | <b>S</b> W <b>W</b> W <b>W</b> W <b>T</b> T <b>N</b> N <b>A</b> A <b>W</b> W <b>W</b> W <b>S</b> |
| VF_0807-VF_0808   | 1        | T <b>A</b> T <b>A</b> A <b>T</b> T <b>T</b> T <b>A</b> G <b>A</b> G <b>T</b> A <b>C</b> G <b>A</b> A <b>A</b> A <b>A</b> A <b>A</b>                                           |
|                   | 2        | A <b>A</b> T <b>T</b> T <b>T</b> T <b>A</b> A <b>G</b> C <b>A</b> G <b>G</b> T <b>G</b> A <b>A</b> A <b>A</b> T <b>A</b> G                                                    |
|                   | 3        | A <b>T</b> T <b>C</b> T <b>T</b> T <b>C</b> G <b>A</b> A <b>T</b> G <b>A</b> T <b>A</b> A <b>A</b> A <b>T</b> A <b>A</b> G                                                    |
|                   | 4        | T <b>T</b> T <b>A</b> A <b>T</b> T <b>T</b> T <b>G</b> C <b>G</b> G <b>G</b> G <b>C</b> G <b>A</b> A <b>T</b> T <b>A</b> A                                                    |
| VF_2356-VF_2357   | 1        | <b>C</b> T <b>T</b> A <b>T</b> T <b>T</b> T <b>A</b> T <b>A</b> A <b>T</b> G <b>C</b> G <b>A</b> A <b>T</b> T <b>A</b> A <b>T</b>                                             |
| VF_1597-VF_1598   | 1        | <b>C</b> A <b>A</b> T <b>T</b> T <b>T</b> T <b>G</b> C <b>A</b> A <b>C</b> A <b>A</b> A <b>A</b> A <b>A</b> A <b>T</b> A <b>T</b> A <b>A</b>                                  |
|                   | 2        | <b>C</b> T <b>A</b> A <b>A</b> T <b>T</b> C <b>A</b> A <b>A</b> G <b>C</b> A <b>A</b> A <b>T</b> A <b>A</b> A <b>C</b>                                                        |
| VF_2138-VF_2139   | 1        | A <b>T</b> A <b>A</b> T <b>T</b> T <b>T</b> A <b>G</b> C <b>G</b> A <b>T</b> A <b>A</b> A <b>A</b> T <b>T</b> A <b>A</b> C                                                    |
| VF_A0714-VF_A0715 | 1        | <b>C</b> T <b>A</b> A <b>A</b> T <b>T</b> T <b>A</b> T <b>T</b> A <b>A</b> T <b>A</b> T <b>A</b> A <b>A</b> A <b>A</b> A <b>C</b>                                             |
|                   | 2        | T <b>T</b> A <b>A</b> A <b>T</b> T <b>T</b> A <b>C</b> A <b>T</b> T <b>T</b> A <b>G</b> A <b>A</b> T <b>T</b> T <b>A</b> T                                                    |

## Figure S1

### Position of putative NagC operator sites

A. The promoter regions upstream of genes (arrows) with transcription profiles altered by NagC (Fig. 2) were examined for putative binding sites (boxes) using the sequence

'wwwttnnnnnnnnaawwww', where w = a/t and n = a/t/c/g. Boxes in gray were tested in the experiments shown in Fig. 4. Genes are not drawn to scale.

B. Sequences of putative NagC operator sites compared to the consensus sequence listed in Fig. 4. Colors indicate a match to the consensus sequence.



**Fig. S2**

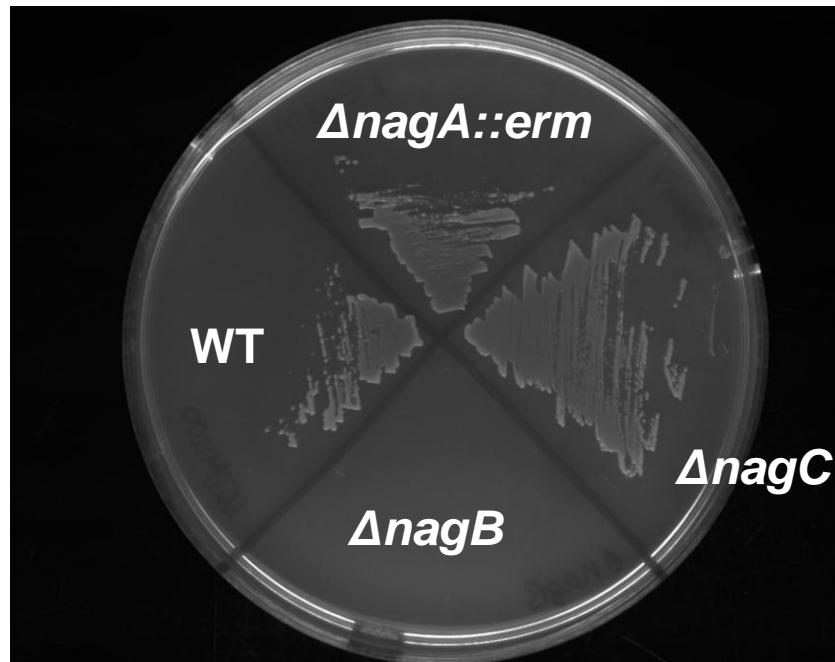

Figure S2.

Growth of *V. fischeri* mutants on GlcNAc.

Single colonies of WT (ES114),  $\Delta nagA::erm$  (WPK54),  $\Delta nagC$  (WPK100), and  $\Delta nagB$  (JAS101) from LBS plates were restreaked onto minimal medium plates containing 278 mM  $Na_2HPO_4$ , 52.7 mM  $NaH_2PO_4$ , 300 mM NaCl, 50 mM  $MgSO_4$ , 10 mM  $CaCl_2$ , 10 mM KCl, 50 mM PIPES pH 8.0, 0.01% casamino acids, 0.001% Sistroms trace elements (Sistrom, 1962), 20 mM *N*-acetyl-D-glucosamine, and 1.5% agar. Image was taken after 24 h of growth at 28°C.

Fig. S3

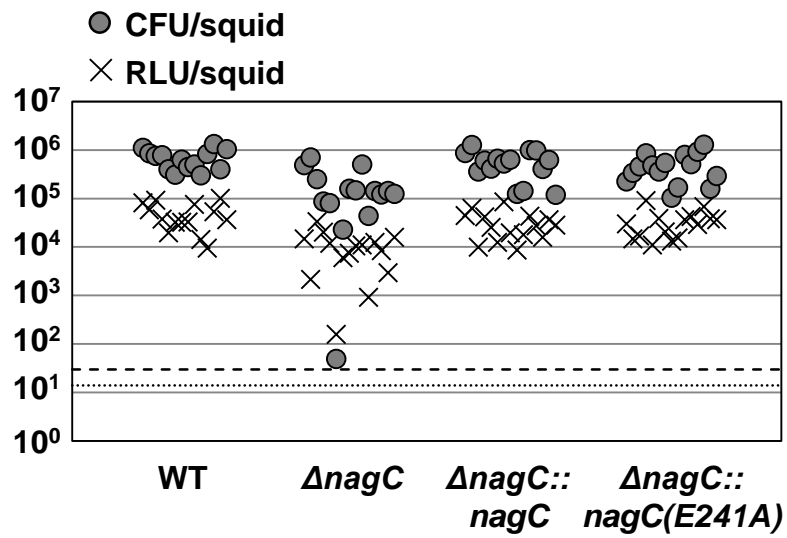

Figure S3.

Single-strain, 20-h, light organ colonization assay

Symbiont population levels (CFU), and relative luminescence levels (RLU), of individual animals at 48 h post-inoculation with WT (ES114),  $\Delta$ nagC (WPK100),  $\Delta$ nagC::*nagC* (TIM377), and  $\Delta$ nagC::*nagC(E241A)* (TIM381) are shown as circles and crosses, respectively. The detection limit for CFUs is indicated by the dotted line, and for luminescence is indicated by a dashed line.

## References

- Amann, E., Ochs, B. and Abel, K.J. (1988) Tightly regulated *tac* promoter vectors useful for the expression of unfused and fused proteins in *Escherichia coli*. *Gene* **69**: 301-315.
- Dunn, A.K., Millikan, D.S., Adin, D.M., Bose, J.L. and Stabb, E.V. (2006) New *rfp*- and pES213-derived tools for analyzing symbiotic *Vibrio fischeri* reveal patterns of infection and *lux* expression in situ. *Appl Environ Microbiol* **72**: 802-810.
- Miyashiro, T., Wollenberg, M.S., Cao, X., Oehlert, D. and Ruby, E.G. (2010) A single *qrr* gene is necessary and sufficient for LuxO-mediated regulation in *Vibrio fischeri*. *Mol Microbiol* **77**: 1556-1567.
- Ruby, E.G., Urbanowski, M., Campbell, J., Dunn, A., Faini, M., Gunsalus, R., *et al.* (2005) Complete genome sequence of *Vibrio fischeri*: a symbiotic bacterium with pathogenic congeners. *Proc Natl Acad Sci U S A* **102**: 3004-3009.
- Shaner, N.C., Campbell, R.E., Steinbach, P.A., Giepmans, B.N., Palmer, A.E. and Tsien, R.Y. (2004) Improved monomeric red, orange and yellow fluorescent proteins derived from *Discosoma* sp. red fluorescent protein. *Nat Biotechnol* **22**: 1567-1572.
- Sistrom, W.R. (1962) The kinetics of the synthesis of photopigments in *Rhodospseudomonas spheroides*. *J Gen Microbiol* **28**: 607-616.
- Stabb, E.V. and Ruby, E.G. (2002) RP4-based plasmids for conjugation between *Escherichia coli* and members of the *Vibrionaceae*. *Methods Enzymol* **358**: 413-426.
